# Supplementary material for: Evaluating tuberculosis service accessibility in Pakistan by analyzing population movement patterns from telecom mobility and survey data
Source: Research Square preprint supplement (doi:10.21203/rs.3.rs-7926116/v1), 2025-11-25
Supplement: Supplementary file 2 [file 5c68fad4ff21908a39b90ebf.docx]

Table 1a. Distribution of sampled TB service points (TB diagnostic and treatment centers) by province or subnational area, urbanicity and socioeconomic classification

|  |  | Socioeconomic classification | | |  |
| --- | --- | --- | --- | --- | --- |
| **Province** | **Urbanicity** | **A & B** | **C** | **D & E** | **Total** |
| Balochistan | Rural | 0 | 6 | 2 | 8 |
| Urban | 2 | 7 | 2 | 11 |
| FATA | Rural | 0 | 0 | 0 | 0 |
| Urban | 0 | 0 | 0 | 0 |
| FCT | Rural | 0 | 0 | 0 | 0 |
| Urban | 0 | 0 | 0 | 0 |
| Karachi | Rural | 0 | 0 | 0 | 0 |
| Urban | 0 | 1 | 0 | 1 |
| Khyber Pakhtunkhwa | Rural | 0 | 4 | 6 | 10 |
| Urban | 4 | 3 | 6 | 13 |
| Punjab | Rural | 3 | 5 | 3 | 11 |
| Urban | 8 | 6 | 1 | 15 |
| Sindh | Rural | 0 | 5 | 6 | 11 |
| Urban | 2 | 3 | 5 | 10 |
| Total |  | **19** | **40** | **31** | **90** |

Table 1b. Distribution of sampled TB service points (private sector TB drug vendors) by province or subnational area, urbanicity and socioeconomic classification

|  |  | Socioeconomic classification | | |  |
| --- | --- | --- | --- | --- | --- |
| **Province** | **Urbanicity** | **A & B** | **C** | **D & E** | **Total** |
| Balochistan | Rural | 0 | 1 | 1 | 2 |
| Urban | 9 | 5 | 2 | 16 |
| FATA | Rural | 0 | 1 | 0 | 1 |
| Urban | 0 | 0 | 0 | 0 |
| FCT | Rural | 0 | 0 | 0 | 0 |
| Urban | 1 | 1 | 0 | 2 |
| Karachi | Rural | 0 | 0 | 1 | 1 |
| Urban | 3 | 5 | 1 | 9 |
| Khyber Pakhtunkhwa | Rural | 2 | 15 | 4 | 21 |
| Urban | 6 | 11 | 6 | 23 |
| Punjab | Rural | 0 | 9 | 1 | 10 |
| Urban | 5 | 5 | 1 | 11 |
| Sindh | Rural | 0 | 2 | 1 | 3 |
| Urban | 3 | 4 | 4 | 11 |
| Total |  | **29** | **59** | **22** | **110** |
